# Supplementary material
Source: PubMed Central journal article supplement (PMC3286627)

# Supporting Information

## Complications from Dual Roles of Sodium Hydride as a Base and as a Reducing Agent

Dusan Heseck, Mijoon Lee, Bruce C. Noll, Jed F. Fisher and Shahriar Mobashery\*

Department of Chemistry and Biochemistry, University of Notre Dame, Notre Dame, IN 46556

### Contents

|                                                             |     |
|-------------------------------------------------------------|-----|
| <sup>1</sup> H NMR of compound <b>3</b> .....               | S2  |
| <sup>13</sup> C NMR of compound <b>3</b> .....              | S3  |
| <sup>1</sup> H NMR of compound <b>3-D</b> .....             | S4  |
| <sup>13</sup> C NMR of compound <b>3-D</b> .....            | S5  |
| <sup>1</sup> H NMR of compound <b>7</b> .....               | S6  |
| H-H COSY of compound <b>7</b> .....                         | S7  |
| <sup>13</sup> C NMR of compound <b>7</b> .....              | S8  |
| Dept Spectrum of compound <b>7</b> .....                    | S9  |
| H-C Hetcor of compound <b>7</b> .....                       | S10 |
| <sup>1</sup> H NMR of compound <b>9</b> .....               | S11 |
| <sup>13</sup> C NMR of compound <b>9</b> .....              | S12 |
| Dept Spectrum of compound <b>9</b> .....                    | S13 |
| <sup>1</sup> H NMR of compound <b>8-D</b> .....             | S14 |
| <sup>13</sup> C NMR of compound <b>8-D</b> .....            | S15 |
| <sup>13</sup> C NMR of compound <b>8-D</b> (expanded) ..... | S16 |
| <sup>1</sup> H NMR of compound <b>9-D</b> .....             | S17 |
| <sup>13</sup> C NMR of compound <b>9-D</b> .....            | S18 |
| <sup>13</sup> C NMR of compound <b>9-D</b> (expanded) ..... | S19 |

DHL-3\_7

exp1 s2pu1

| SAMPLE      |            | DEC. & VT  |            |
|-------------|------------|------------|------------|
| date        | Nov 9 2007 | dfrq       | 499.864    |
| solvent     | CDC13      | dn         | H1         |
| file        | exp        | dpwr       | 30         |
| ACQUISITION |            | uof        | 0          |
| sfrq        | 499.864    | dm         | nnn        |
| tn          | H1         | dmm        | c          |
| at          | 5.016      | dmf        | 200        |
| np          | 65536      | dseq       |            |
| sw          | 6533.3     | dres       | 1.0        |
| fb          | 4000       | homo       | n          |
| bs          | 4          |            |            |
| tpwr        | 61         | dfrq2      | DEC2 0     |
| pw          | 13.5       | dn2        |            |
| d1          | 0.100      | dpwr2      | 1          |
| tof         | 269.9      | dof2       | 0          |
| nt          | 8          | dm2        | n          |
| ct          | 8          | dmm2       | c          |
| alock       | n          | dmf2       | 200        |
| gain        | 30         | dseq2      |            |
| FLAGS       |            | dres2      | 1.0        |
| fl          | n          | homo2      | n          |
| tn          | n          |            |            |
| dp          | y          | dfrq3      | DEC3 0     |
| hs          | nn         | dn3        |            |
| DISPLAY     |            | dpwr3      | 1          |
| sp          | 1120.6     | dof3       | 0          |
| wp          | 4695.8     | dm3        | n          |
| vs          | 33         | dmm3       | c          |
| sc          | 0          | dmf3       | 200        |
| wc          | 250        | dseq3      |            |
| h2mm        | 18.78      | dres3      | 1.0        |
| fs          | 100.00     | homo3      | n          |
| rfl         | 510.6      | PROCESSING |            |
| rfp         | 0          | wf file    |            |
| th          | 7          | proc       | ft         |
| ins         | 2.000      | fn         | 65536      |
| af          | ph         | math       | f          |
|             |            | werr       |            |
|             |            | wexp       | process pH |
|             |            | wbs        |            |
|             |            | wnt        | wft        |

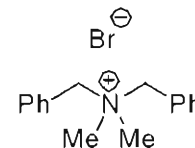

3

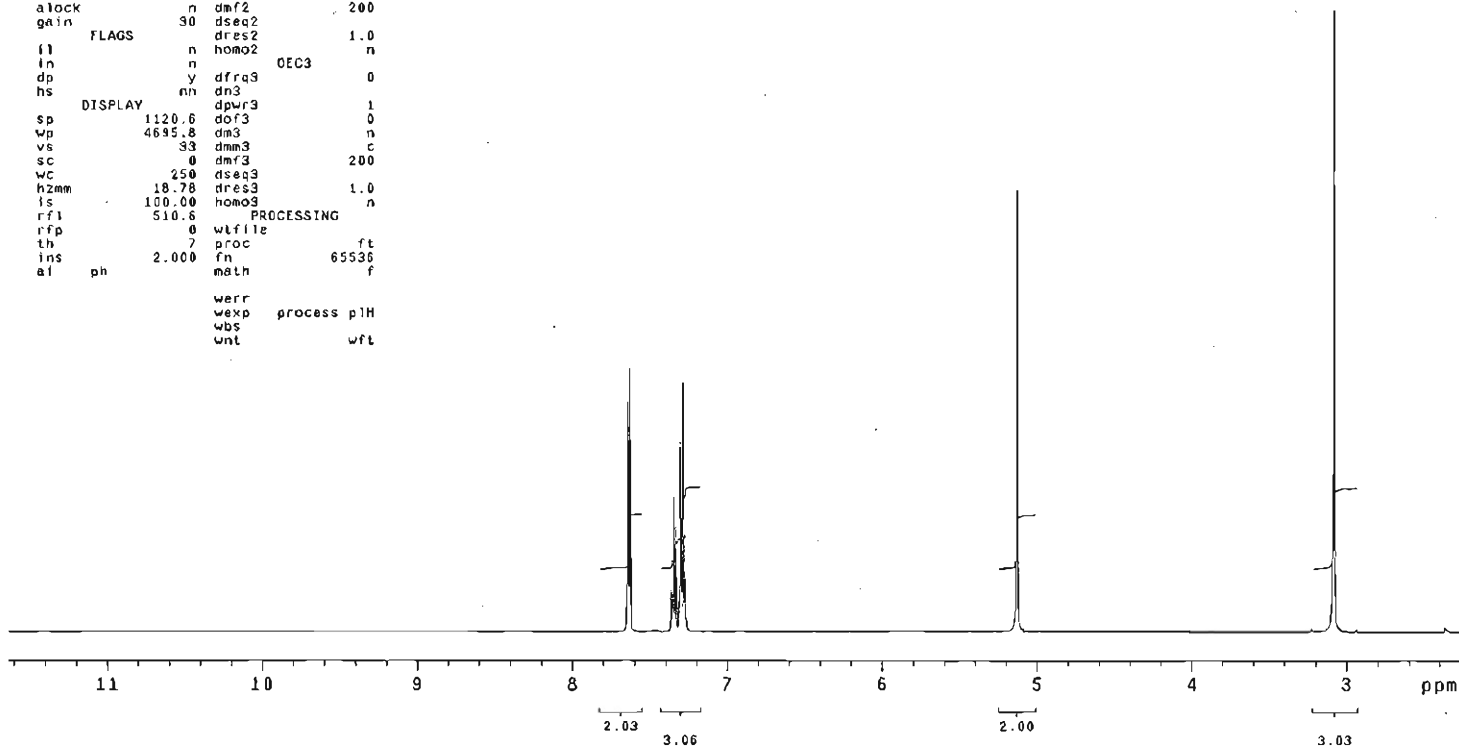

DHL-3\_7

exp2 s2pu1

| SAMPLE      |            | REC. & VT  |         |
|-------------|------------|------------|---------|
| date        | Nov 9 2007 | dfrq       | 499.864 |
| solvent     | CDC13      | dn         | HL      |
| file        | exp        | dpr        | 40      |
| ACQUISITION |            |            |         |
| sfrq        | 125.702    | dof        | 0       |
| ln          | C13        | dmm        | W       |
| al          | 1.215      | dmf        | 8787.35 |
| np          | 65536      | dseq       |         |
| sw          | 26963.3    | dres       | 1.0     |
| fb          | 15000      | homo       | n       |
| bs          | 4          | DEC2       |         |
| tpwr        | 52         | dfrq2      | 0       |
| pw          | 10.2       | dn2        |         |
| d1          | 1.800      | dpr2       | 1       |
| tof         | 144.5      | dof2       | 0       |
| nt          | 640        | dm2        | n       |
| ct          | 82         | dmm2       | C       |
| alock       |            | dmt2       | 10000   |
| gain        | not used   | dseq2      |         |
| FLAGS       |            |            |         |
|             |            | dres2      | 1.0     |
| i1          | n          | homo2      | n       |
| in          | n          | DEC3       |         |
| dp          | y          | dfrq3      | 0       |
| hs          | nn         | dn3        |         |
| DISPLAY     |            |            |         |
| sp          | 3682.8     | dpr3       | 1       |
| wp          | 19486.8    | dof3       | 0       |
| vs          | 132        | dm3        | n       |
| sc          | 0          | dmm3       | C       |
| wc          | 250        | dmf3       | 10000   |
| hzmm        | 77.95      | dseq3      |         |
| is          | 500.00     | dres3      | 1.0     |
| rfl         | 11132.6    | homo3      | n       |
| rtp         | 9676.1     | PROCESSING |         |
| lh          | 5          | lp         | 1.00    |
| lms         | 100.000    | wfile      |         |
| al cdc ph   |            | proc       | fl      |
|             |            | fn         | 131072  |
|             |            | math       | f       |

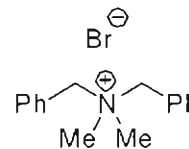

3

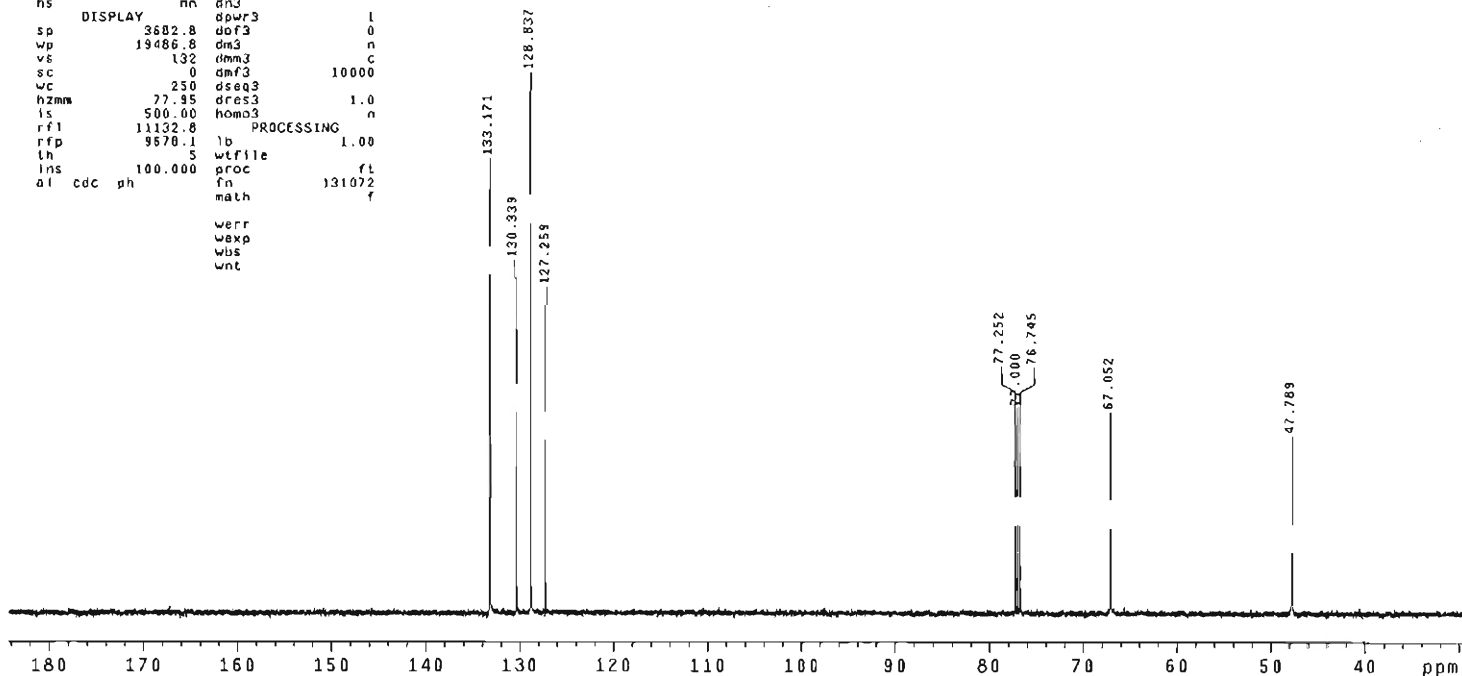

DHL-3\_7-BnBr-DMF-NaH

exp7 s2pu1

| SAMPLE      |             | DEC. & VT  |             |
|-------------|-------------|------------|-------------|
| date        | Sep 24 2008 | dfrq       | 499.866     |
| solvent     | dmf         | dn         | H1          |
| file        | exp         | dpwr       | 30          |
| ACQUISITION |             |            |             |
| sfrq        | 499.866     | dm         | nnn         |
| tn          | H1          | dmm        | c           |
| at          | 5.016       | dmf        | 200         |
| np          | 65536       | dseq       |             |
| sw          | 6533.3      | dres       | 1.0         |
| fb          | 4000        | homo       | n           |
| bs          | 4           |            |             |
| tpwr        | 61          | DEC2       |             |
| pw          | 13.5        | dfrq2      | 0           |
| d1          | 0.100       | dn2        |             |
| tof         | 269.9       | dpwr2      | 1           |
| nt          | 16          | dof2       | 0           |
| ct          | 16          | dm2        | n           |
| alock       | n           | dmm2       | c           |
| gain        | not used    | dmf2       | 200         |
|             |             | dseq2      |             |
| il          | FLAGS       | dres2      | 1.0         |
| in          | n           | homo2      | n           |
| dp          | y           | DEC3       |             |
| hs          | nn          | dfrq3      | 0           |
|             |             | dn3        |             |
| DISPLAY     |             |            |             |
| sp          | 9.2         | dpwr3      | 1           |
| wp          | 5073.6      | dof3       | 0           |
| vs          | 27          | dm3        | n           |
| sc          | 0           | dmm3       | c           |
| wc          | 250         | dmf3       | 200         |
| hzmm        | 20.29       | dseq3      |             |
| is          | 105.52      | dres3      | 1.0         |
| rf1         | 4537.1      | homo3      | n           |
| rff         | 4013.9      | PROCESSING |             |
| th          | 61          | wtfile     | ft          |
| ins         | 4.000       | proc       | 65536       |
| ai          | ph          | fn         | f           |
|             |             | math       |             |
|             |             | werr       |             |
|             |             | wexp       | process p1H |
|             |             | wbs        |             |
|             |             | /nt        | wft         |

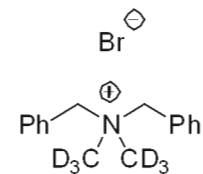

3-D

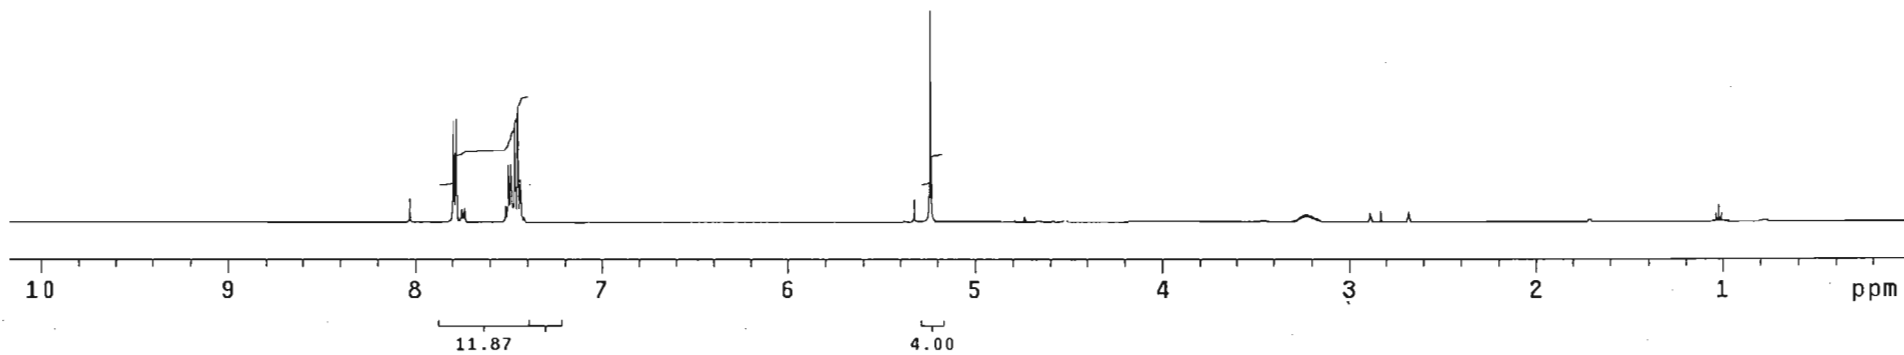

DHL-3\_7-BnBr-DMF-NaH

exp8 s2pu1

|             |             |            |         |
|-------------|-------------|------------|---------|
| SAMPLE      |             | DEC. & VT  |         |
| date        | Sep 24 2008 | dfrq       | 499.866 |
| solvent     | dmf         | dn         | H1      |
| file        | exp         | dpwr       | 40      |
| ACQUISITION |             |            |         |
| sfrq        | 125.703     | dm         | YYY     |
| tn          | C13         | dmm        | w       |
| at          | 1.215       | dmf        | 8787.35 |
| np          | 65536       | dseq       |         |
| sw          | 26963.3     | dres       | 1.0     |
| fb          | 15000       | homo       | n       |
| bs          | 4           | DEC2       |         |
| tpwr        | 52          | dfrq2      | 0       |
| pw          | 10.2        | dn2        |         |
| d1          | 1.800       | dpwr2      | 1       |
| tof         | 144.5       | dof2       | 0       |
| nt          | 1200        | dm2        | n       |
| ct          | 256         | dmm2       | c       |
| alock       | n           | dmf2       | 10000   |
| gain        | not used    | dseq2      |         |
| FLAGS       |             |            |         |
| il          | n           | homo2      | n       |
| in          | n           | DEC3       |         |
| dp          | y           | dfrq3      | 0       |
| hs          | nn          | dn3        |         |
| DISPLAY     |             |            |         |
| sp          | -1421.9     | dpwr3      | 1       |
| wp          | 26962.9     | dof3       | 0       |
| vs          | 326         | dm3        | n       |
| sc          | 0           | dmm3       | c       |
| wc          | 250         | dmf3       | 10000   |
| hzmm        | 0.13        | dseq3      |         |
| is          | 500.00      | dres3      | 1.0     |
| rfl         | 1422.4      | homo3      | n       |
| rfl         | 1422.4      | PROCESSING |         |
| rfl         | 0           | lb         | 1.00    |
| th          | g           | wtfil      |         |
| ins         | 100.000     | proc       | ft      |
| ai          | cdc ph      | fn         | 131072  |
|             |             | math       | f       |

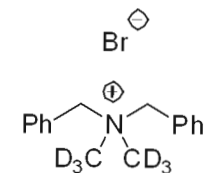

3-D

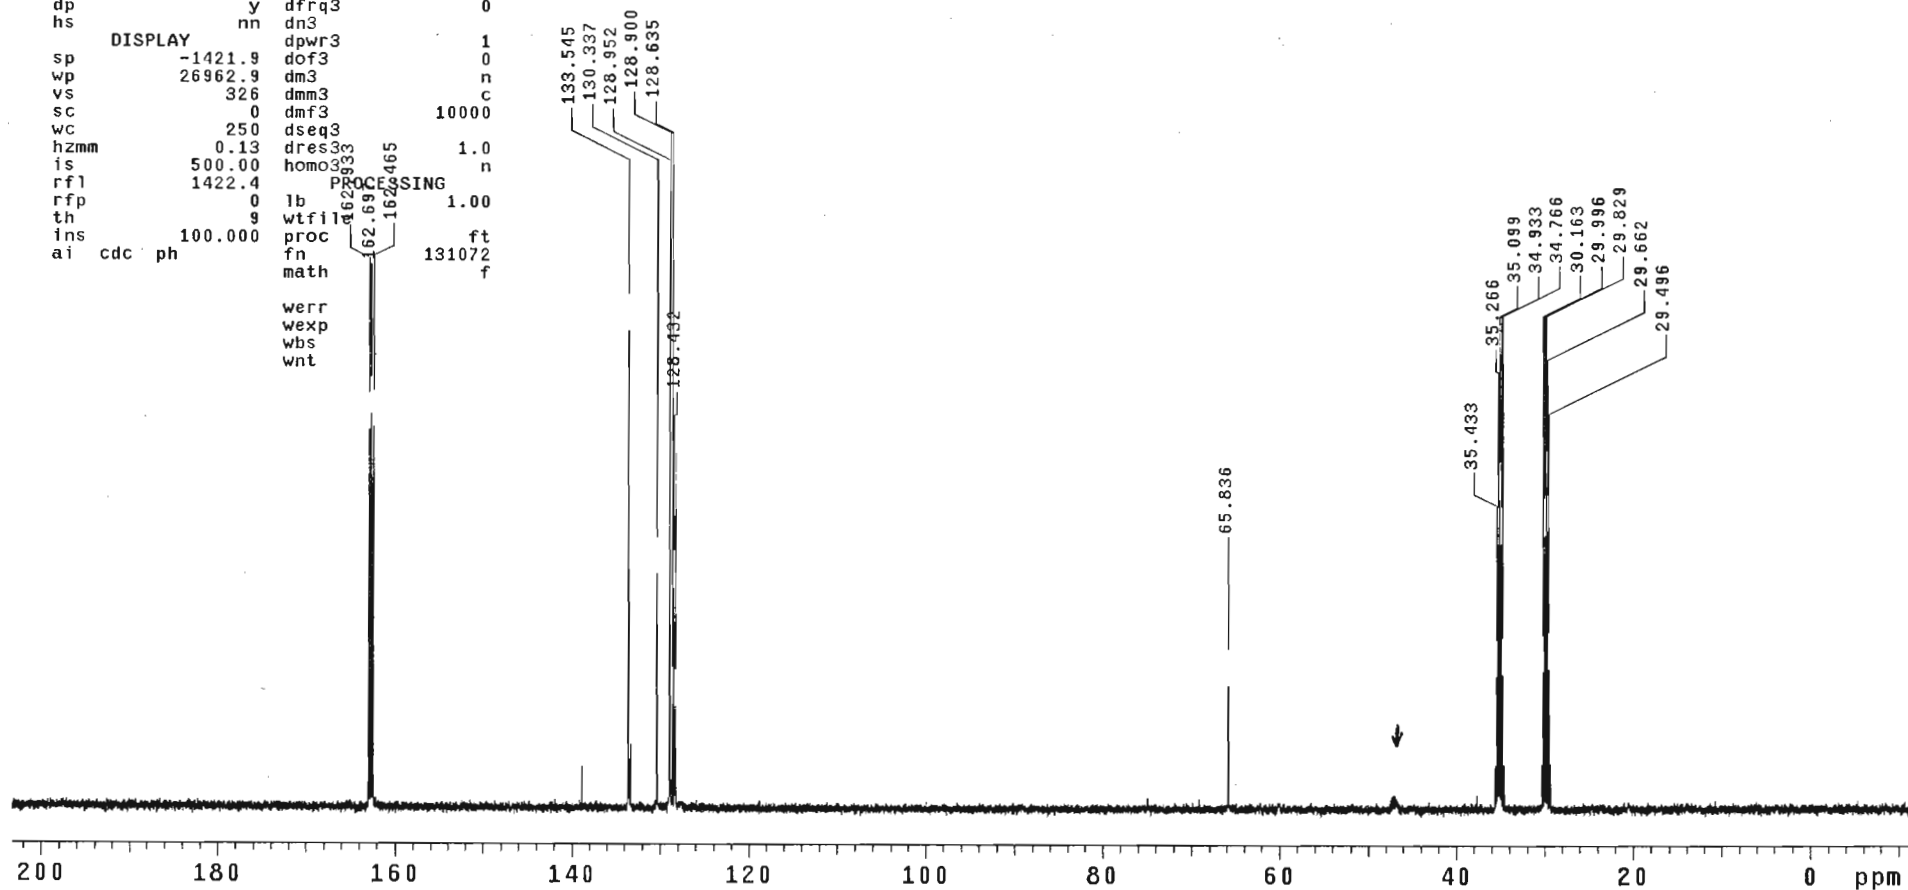

DHL-56

exp1 s2pu1

| SAMPLE      |             | DEC. & VT |            |
|-------------|-------------|-----------|------------|
| date        | Mar 26 2008 | dfrq      | 499.864    |
| solvent     | CDC13       | dn        | H1         |
| file        | exp         | dpwr      | 30         |
| ACQUISITION |             |           |            |
| sfrq        | 499.864     | dof       | 0          |
| tn          | H1          | dm        | nnn        |
| at          | 5.016       | dmm       | c          |
| np          | 65536       | dmf       | 200        |
| sw          | 6533.3      | dseq      |            |
| fb          | 4000        | dres      | 1.0        |
| bs          | 4           | homo      | n          |
| tpwr        | 61          | dfrq2     | DEC2 0     |
| pw          | 13.5        | dn2       |            |
| d1          | 0.100       | dpwr2     | 1          |
| tof         | 269.9       | dof2      | 0          |
| nt          | 16          | dm2       | n          |
| ct          | 16          | dmm2      | c          |
| alock       | n           | dmf2      | 200        |
| gain        | not used    | dseq2     |            |
| il          | FLAGS       | dres2     | 1.0        |
| in          | n           | homo2     | n          |
| dp          | y           | dfrq3     | DEC3 0     |
| hs          | nn          | dn3       |            |
| DISPLAY     |             |           |            |
| sp          | 399.6       | dpwr3     | 1          |
| wp          | 4601.5      | dof3      | 0          |
| vs          | 53          | dm3       | n          |
| sc          | 0           | dmm3      | c          |
| wc          | 250         | dmf3      | 200        |
| hzmm        | 18.41       | dseq3     |            |
| is          | 50.61       | dres3     | 1.0        |
| rfl         | 510.8       | homo3     | n          |
| PROCESSING  |             |           |            |
| rffp        | 0           | wffile    |            |
| th          | 7           | proc      | ft         |
| ins         | 10.000      | fn        | 65536      |
| ai          | ph          | math      | f          |
|             |             | werr      |            |
|             |             | wexp      | process pH |
|             |             | wbs       |            |
|             |             | wnt       | wft        |

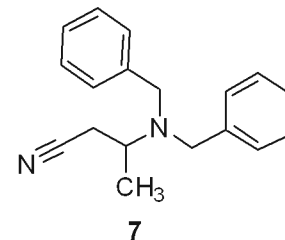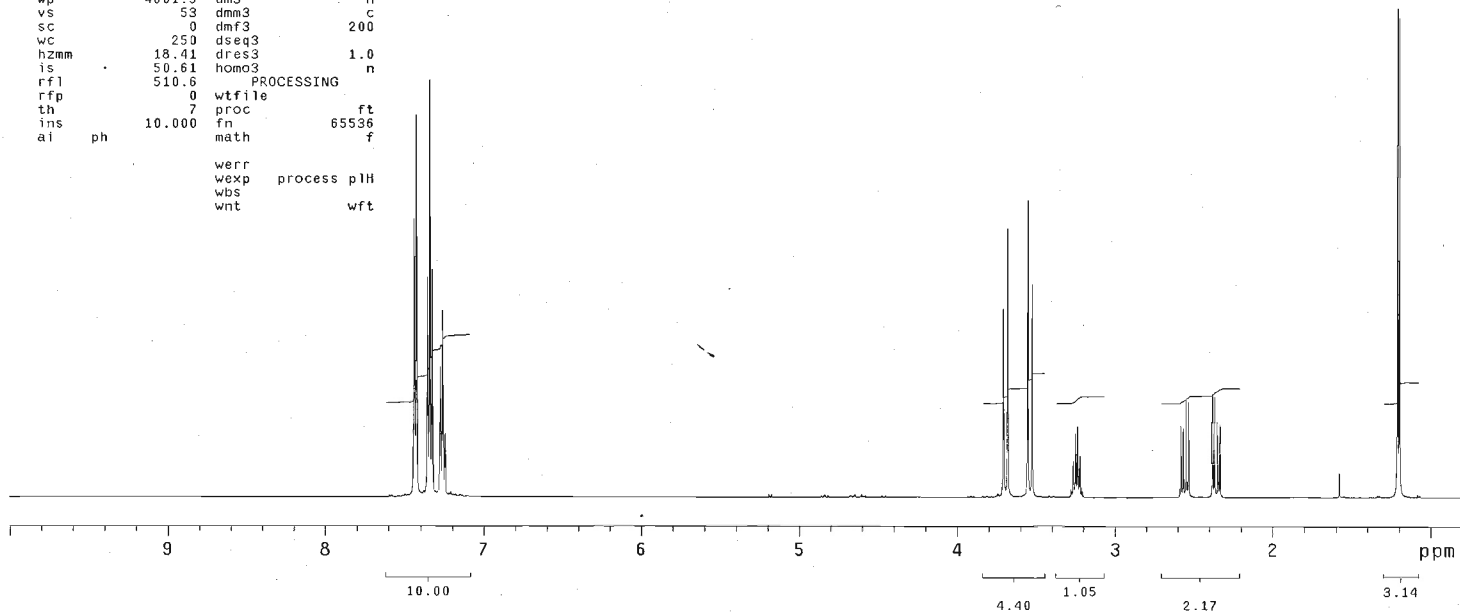

DHL-56

Pulse Sequence: relayh

Solvent: CDCl<sub>3</sub>

Ambient temperature

INOVA-500 "nmr2a.chem.nd.edu"

Relax. delay 1.300 sec  
COSY 90-90  
Acq. time 0.147 sec  
Width 3482.8 Hz  
2D Width 3482.8 Hz  
4 repetitions  
256 increments

OBSERVE H1, 499.8611751 MHz

DATA PROCESSING

Sine bell 0.074 sec

F1 DATA PROCESSING

Sine bell 0.037 sec

FT size 1024 x 1024

Total time 25 min, 41 sec

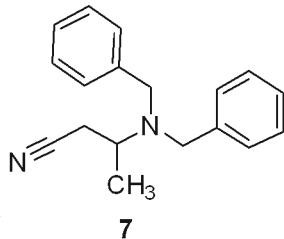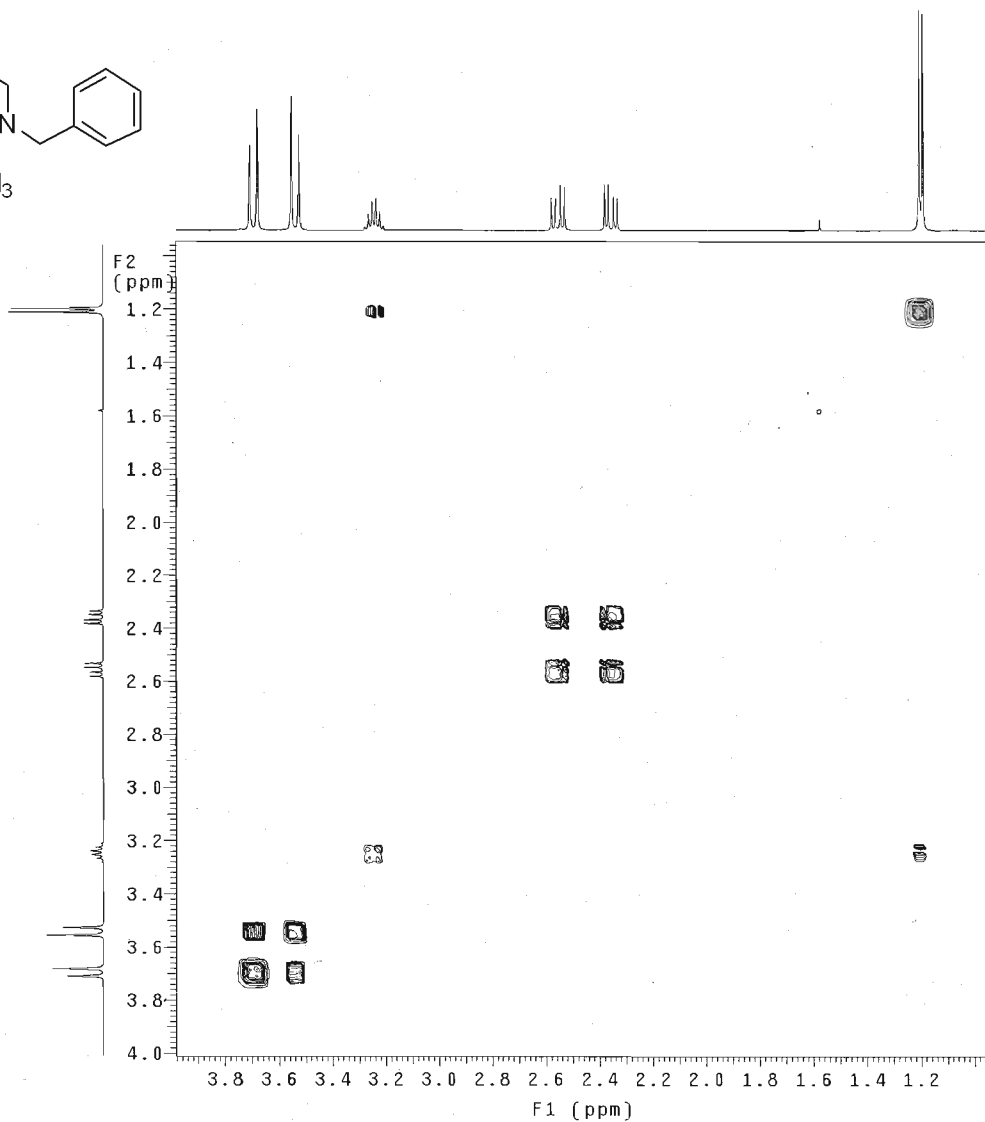

DHL-56

exp6 s2pu1

SAMPLE DEC. & VT  
date Mar 26 2008 dfrq 499.864  
solvent CDC13 dn H1  
file /afs/nd.edu/u~ dpwr 40  
ser26/dhesek/Priva~ dof 0  
te/DHL/DHL-56-C.fi~ dmm yyy  
d w  
ACQUISITION dmf 8787.35  
sfrq 125.702 dseq  
tn C13 dres 1.0  
at 1.215 homo n  
np 65536 DEC2  
sw 26963.3 dfrq2 0  
fb 15000 dn2  
bs 4 dpwr2 1  
tpwr 52 dof2 0  
pw 10.2 dm2 n  
d1 1.800 dmm2 c  
tof 144.5 dmf2 10000  
nt 640 dseq2  
ct 47 dres2 1.0  
alock n homo2 n  
gain not used DEC3  
FLAGS dfrq3 0  
il n dn3  
in n dpwr3 1  
dp y dof3 0  
hs nn dm3 n  
DISPLAY dmm3 c  
sp 16.6 dmf3 10000  
wp 22604.6 dseq3  
vs 85 dres3 1.0  
sc 0 homo3 n  
wc 250 PROCESSING 1.0  
hzmm 90.42 lb  
is 500.00 wtfile  
rfl 11114.3 proc ft  
rfp 9678.1 fn 131072  
th 4 math f  
ins 100.000  
al cdc ph werr  
wexp  
wbs  
wnt

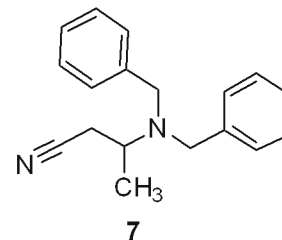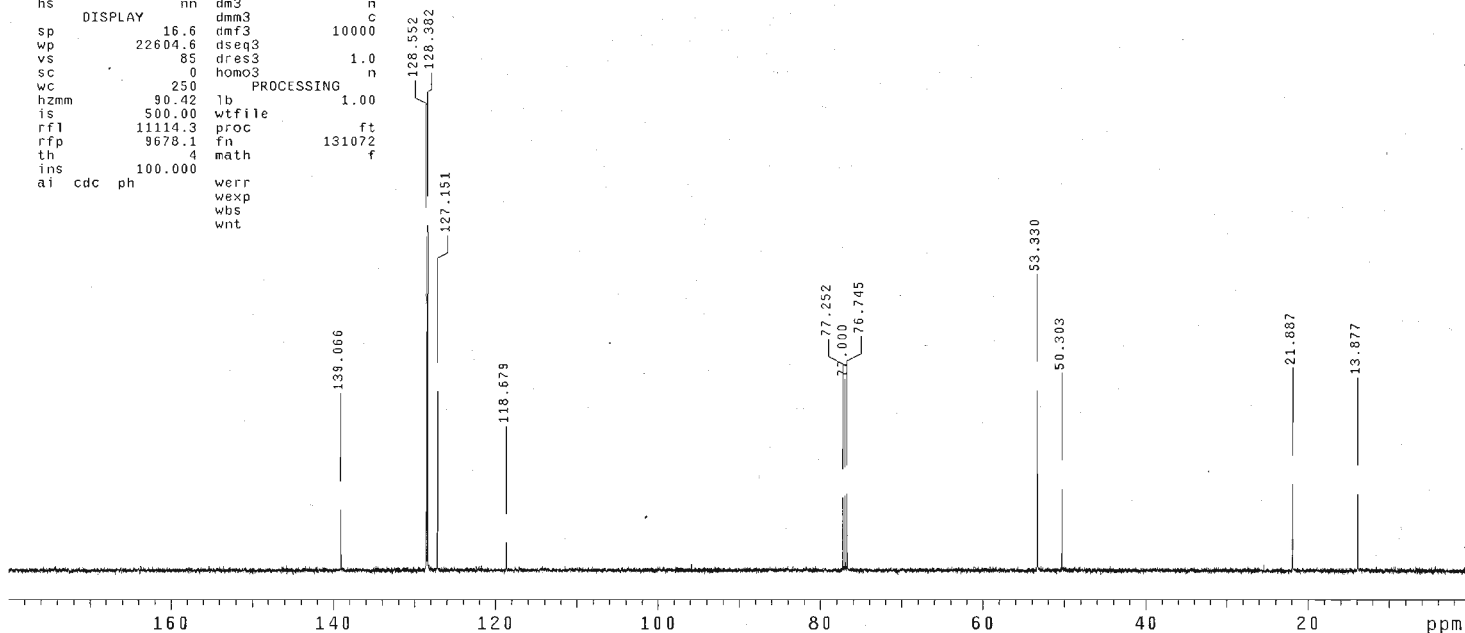



DHL-56

Pulse Sequence: dept

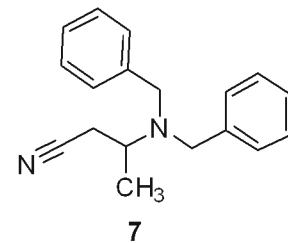

CH3 carbons

CH2 carbons

CH carbons

all protonated carbons

150 140 130 120 110 100 90 80 70 60 50 40 30 20 10 ppm

DHL-56

Pulse Sequence: hetcor

Solvent: CDCl3

Ambient temperature

User: 1-14-87

INNOVA-500 "nmr2a.chem.nd.edu"

Relax. delay 1.500 sec

Acq. time 0.111 sec

Width 18403.5 Hz

2D Width 3543.1 Hz

4 repetitions

256 increments

OBSERVE C13, 125.6902003 MHz

DECOUPLE H1, 499.8634369 MHz

Power 40 dB

on during acquisition

off during delay

WALTZ-16 modulated

DATA PROCESSING

Line broadening 1.0 Hz

F1 DATA PROCESSING

Line broadening 0.3 Hz

FT size 4096 x 1024

Total time 28 min, 38 sec

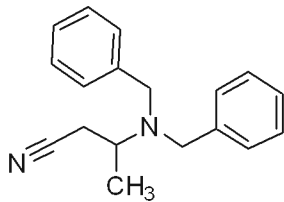

7

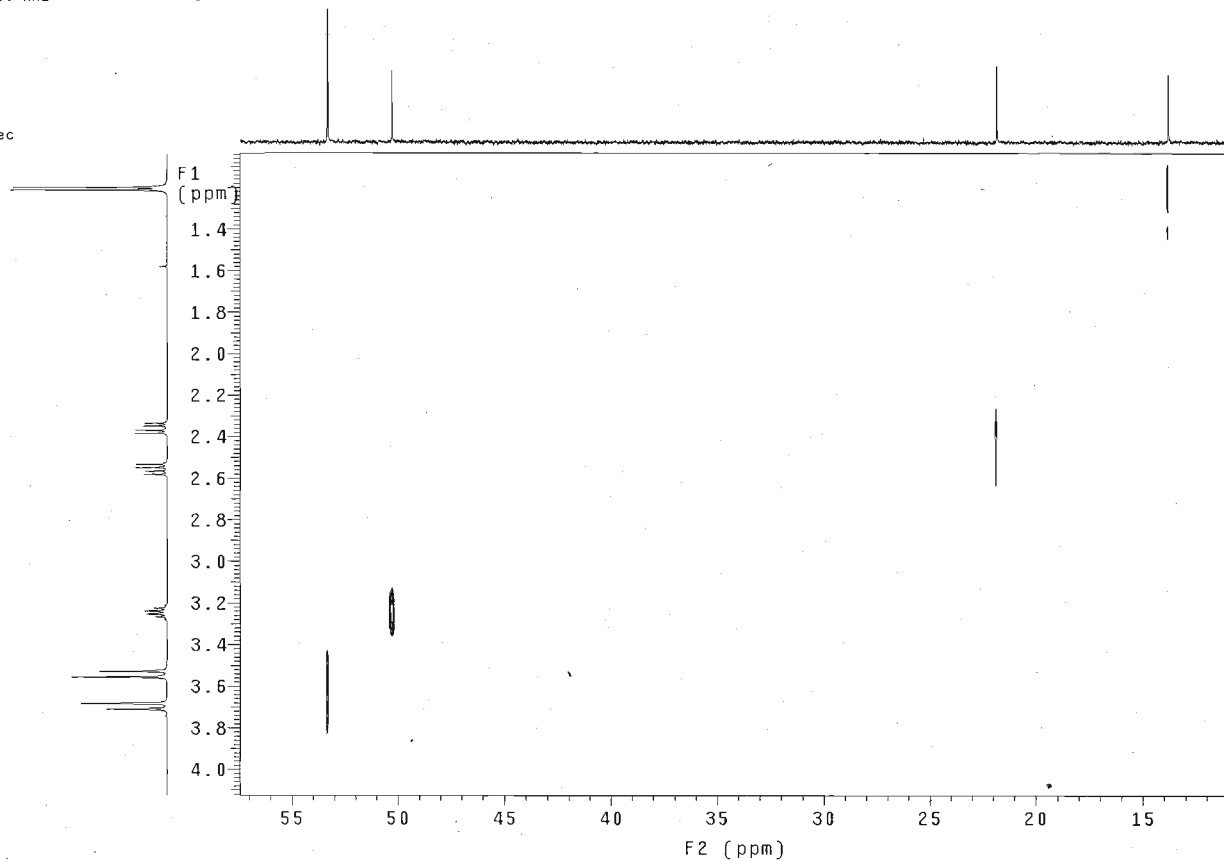

DHL-56b

exp3 s2pu1

```
SAMPLE          DEC. & VT
date Mar 30 2008 dfrq          499.864
solvent CDC13 dn              H1
file /afs/nd.edu/u~ dpwr      30
ser26/dhesek/Priva~ dof       0
te/DHL/DHL-56b-H.f~ dm        nnn
                                     id dmm          200
ACQUISITION
sfrq          499.864 dmf
tn            H1 dres          1.0
at           5.016 homo        n
np           65536 DEC2        0
sw           6533.3 dfrq2
fb           4000 dn2
bs            4 dpwr2          1
tpwr         61 dof2           0
pw           13.5 dm2           n
dl           0.100 dmm2         c
tof          269.9 dmf2         200
nt            16 dseq2
ct            16 dres2          1.0
alock         n homo2          n
gain          not used PROCESSING
FLAGS
fl            n wtfile
in            n proc           ft
dp            y fn             65536
hs            y math           f
DISPLAY
sp           -4.1 werr
wp           5004.8 wbs process pH
vs           -71 wnt
sc            0
wc            250
hzmm         20.02
is           87.33
rf1          497.4
rfp           0
th            50
ins          3.000
a1           ph
```

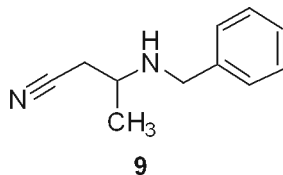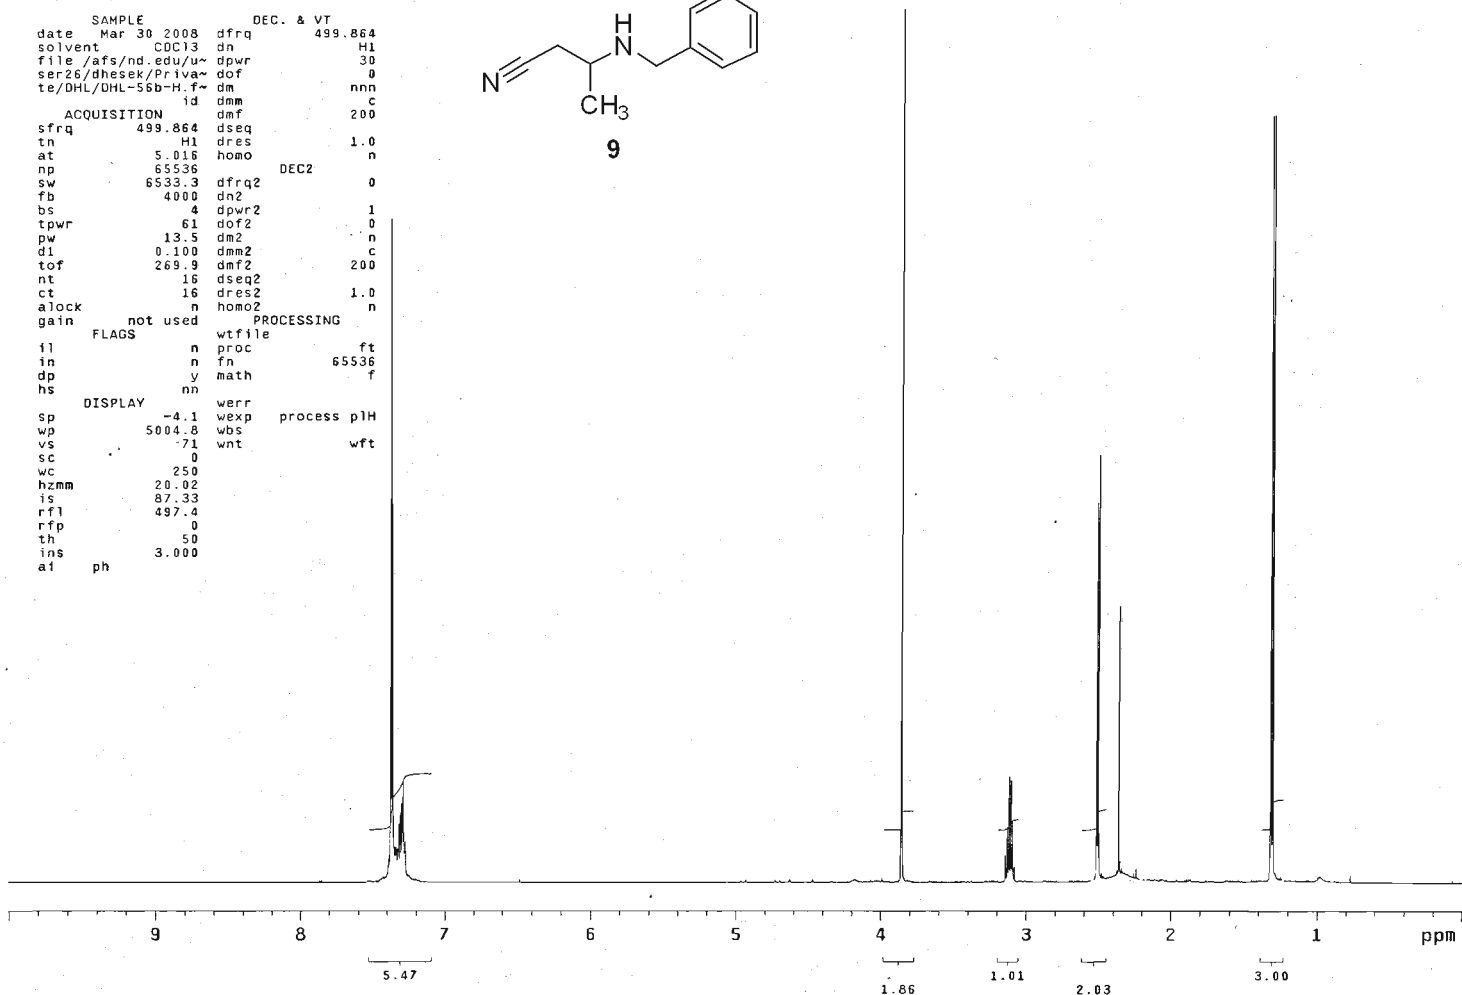

DHL-56b

exp2 s2pu1

SAMPLE DEC. & VT  
date Mar 30 2008 dfrq 499.864  
solvent CDC13 dn H1  
file /afs/nd.edu/u- dpwr 40  
ser26/dhesek/Private/ dof 0  
te/DHL/DHL-56b-C.f- dm yyy  
id dmm w  
8787.35  
ACQUISITION dmf  
sfrq 125.702 dseq 8787.35  
tn C13 dres 1.0  
at 1.215 homo n  
np 65536 PROCESSING  
sw 26963.3 lb 1.00  
fb 15000 wtfile  
bs 4 proc ft  
tpwr 52 fn 131072  
pw 10.2 math f  
d1 1.800  
tof 144.5 werr  
nt 1200 wexp  
ct 107 wbs  
aLock n wnt  
gain not used  
FLAGS  
il n  
in n  
dp y  
hs nn  
DISPLAY  
sp -122.6  
wp 25297.8  
vs 146  
sc 0  
wc 250  
hzm 101.19  
is 500.00  
rf1 11111.6  
rfp 9678.1  
th 4  
ins 100.000  
ai cdc ph

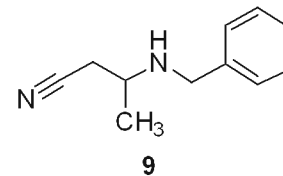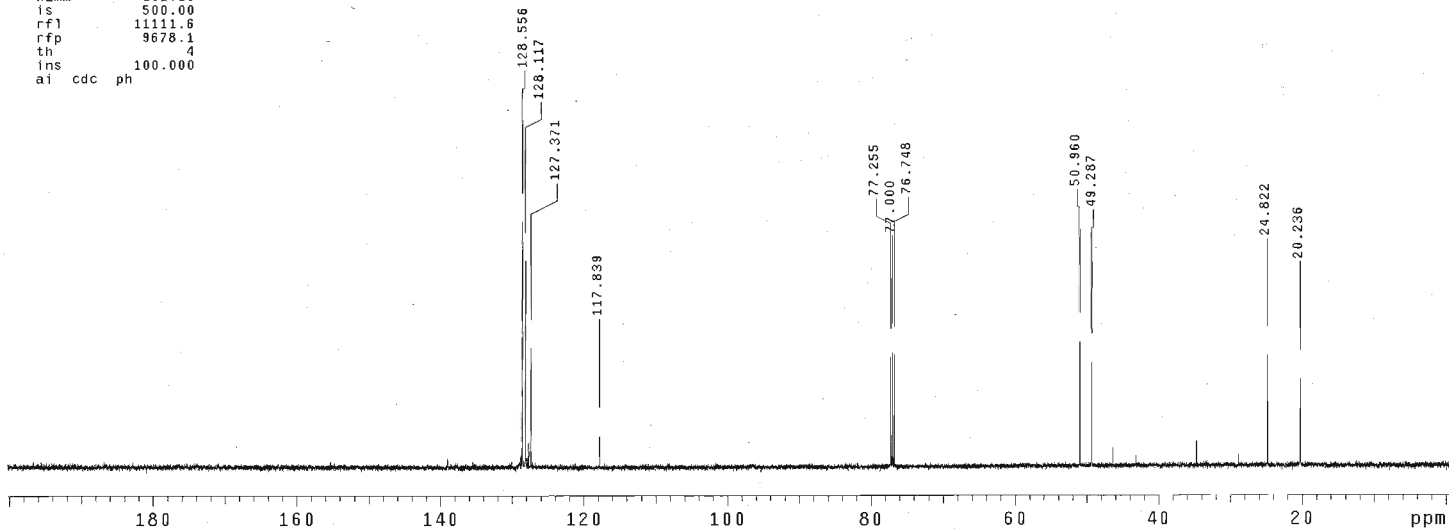

DHL-56b

Pulse Sequence: dept

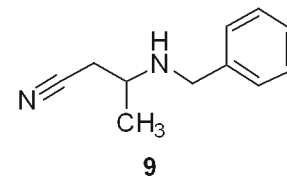

CH3 carbons

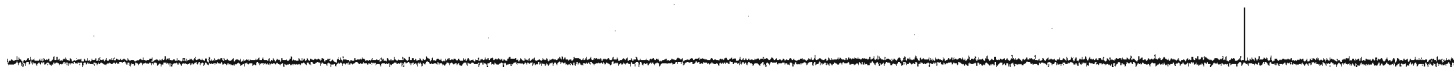

CH2 carbons

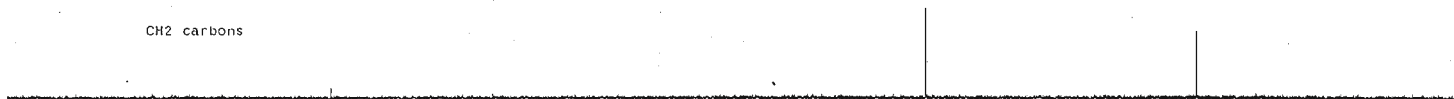

CH carbons

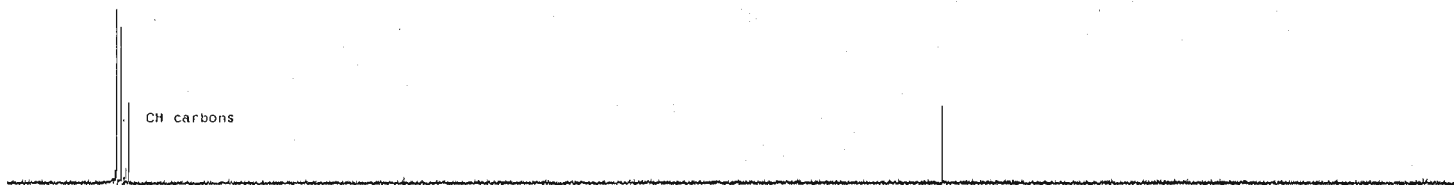

all protonated carbons

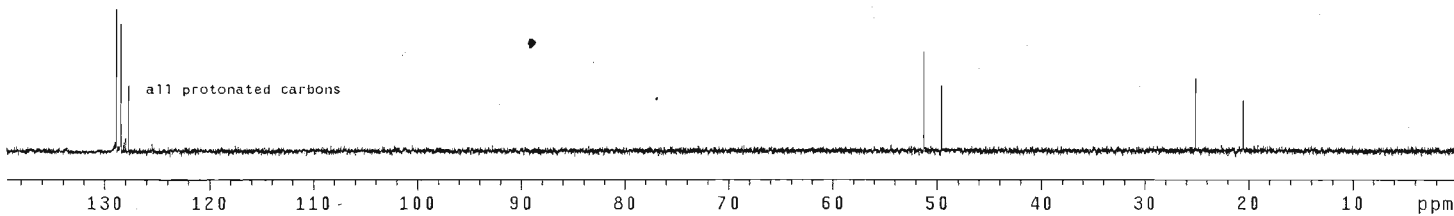

DHL-56D-2C

exp4 s2pu1

```
SAMPLE          DEC. & VT
date  Apr 20 2008  dfrq      499.864
solvent  CDC13      dn        H1
file     ACQUISITION  exp      dpwr     30
          499.864      dm        nnn
sfrq     499.864      dmm     c
tn       H1          dmf     200
at       5.016       dseq
np       65536       dres     1.0
sw       6533.3      homo    n
fb       4000
bs       4
tpwr     61          dfrq2    0
pw       13.5        dn2
d1       0.100       dpwr2    1
tof      269.9       dof2     0
nt       16          dm2     n
ct       16          dmm2    c
alock    n           dmf2    200
gain     not used    dseq2
          FLAGS      dres2    1.0
          n           homo2    n
          n           dfrq3    0
          y           dn3
          nn          dpwr3    1
          DISPLAY    dof3     0
          -510.4      dm3     n
          6533.1      dmm3    c
          39          dmf3    200
          0           dseq3
          wc       25.0       dres3    1.0
          hzmm     26.13      homo3    n
          is       50.00
          rf1      510.6      PROCESSING
          rfp      0          wtfiler
          th       7          proc
          lns     2.000      fn       65536
          at       ph        math
          werr
          wexp     process pH
          wbs
          wnt      wft
```

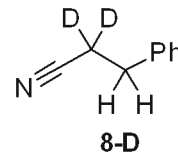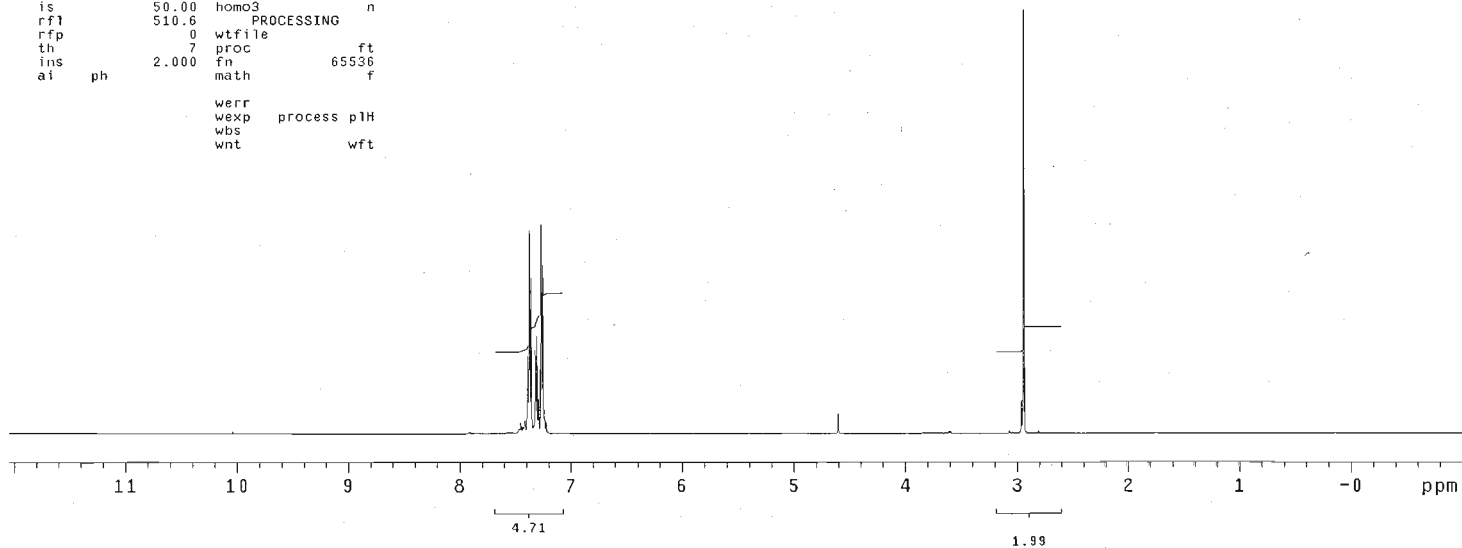

DHL-560-2C

exp2 s2pu1

```
SAMPLE      DEC. & VT
date Apr 20 2008  dfrq      499.864
solvent CDC13      dn        H1
file        exp     dpwr      40
ACQUISITION  dof      0
sfrq       125.702  dm         yy
tn          C13     dmm        w
at          1.215   dmf        8787.35
np          65536   dseq       1.0
sw          26963.3 dres       n
fb          15000   homo
bs          4
tpwr        52     dfrq2      0
pw          10.2   dn2
d1          1.800   dpwr2      1
tof         144.5   dof2       0
nt          640    dm2        n
ct          64     dmm2       c
alock       n      dmf2      10000
gain        not used
          FLAGS   dseq2     1.0
          n      dres2     n
          n      homo2
          DEC3   dfrq3     0
          dn3
          DISPLAY dpwr3     1
          sp      -10.5   dof3     0
          wp      22604.6  dm3      n
          vs      32     dmm3     c
          sc      0      dmf3     10000
          wc      250    dseq3    1.0
          hzmm    90.42  dres3    n
          is      500.00 homo3
          rf1     11141.4 PROCESSING
          rfp     9678.1 lb         1.00
          th      3      wtfile
          lns     100.000 ft
          ai cdc ph   fn        131072
          math      f
          werr
          wexp
          wbs
          wnt
```

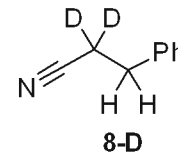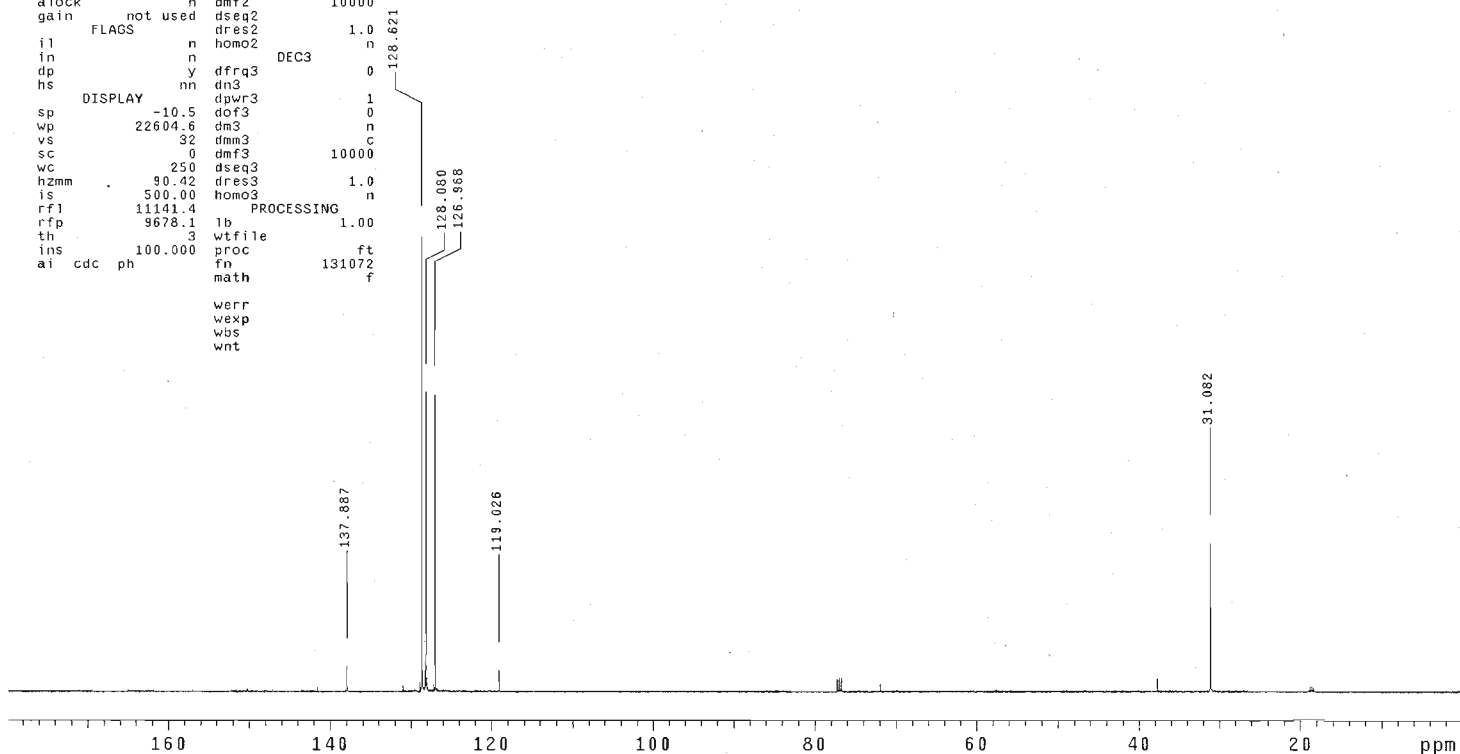

DHL-560-2C

exp2 s2pul

31-082

| SAMPLE      |             | DEC. & VT  |         |
|-------------|-------------|------------|---------|
| date        | Apr 20 2008 | dfrq       | 499.864 |
| solvent     | CDC13       | dn         | H1      |
| file        | exp         | dpwr       | 40      |
| ACQUISITION |             |            |         |
| sfrq        | 125.702     | dm         | yyy     |
| tn          | C13         | dmm        | w       |
| at          | 1.215       | dmf        | 8787.35 |
| np          | 65536       | dseq       |         |
| sw          | 26963.3     | dres       | 1.0     |
| fb          | 15000       | homo       | n       |
| bs          | 4           |            |         |
| tpwr        | 52          | dfrq2      | DEC2 0  |
| pw          | 10.2        | dn2        |         |
| d1          | 1.800       | dpwr2      | 1       |
| tof         | 144.5       | dof2       | 0       |
| nt          | 640         | dm2        | n       |
| ct          | 68          | dmm2       | c       |
| alock       | n           | dmf2       | 10000   |
| gain        | not used    | dseq2      |         |
| FLAGS       |             |            |         |
| il          | n           | dres2      | 1.0     |
| in          | n           | homo2      | n       |
| dp          | y           |            |         |
| hs          | nn          | dfrq3      | DEC3 0  |
| DISPLAY     |             |            |         |
| sp          | 2115.3      | dn3        |         |
| wp          | 2550.8      | dpwr3      | 1       |
| vs          | 433         | dof3       | 0       |
| sc          | 0           | dm3        | n       |
| wc          | 250         | dmm3       | c       |
| h2mm        | 10.20       | dmf3       | 10000   |
| is          | 500.00      | dseq3      |         |
| rfl         | 11141.4     | dres3      | 1.0     |
| rfp         | 9678.1      | homo3      | n       |
| th          | 6           | PROCESSING |         |
| ins         | 100.000     | lb         | 1.00    |
| al          | cdc ph      | wffile     |         |
|             |             | proc       | ft      |
|             |             | fn         | 131072  |
|             |             | math       | f       |
|             |             | werr       |         |
|             |             | wexp       |         |
|             |             | wbs        |         |
|             |             | wnt        |         |

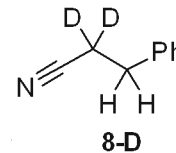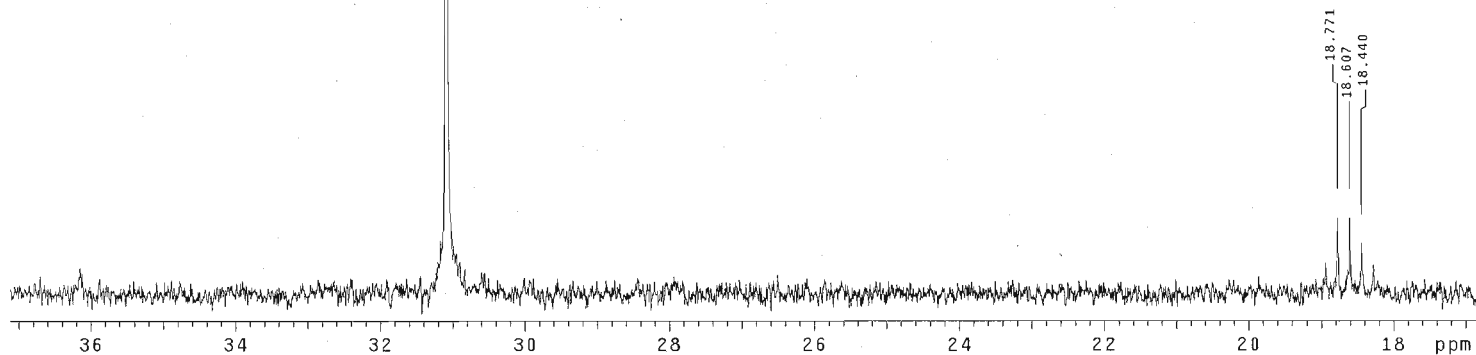



DHL-56D\_3C

exp3 s2pu1

```
SAMPLE          DEC. & VT
date Apr 18 2008 dfrq          299.948
solvent cdc13 dn              H1
file      exp dpwr            30
ACQUISITION    dof            0
sfrq        299.948 dm         nnn
tn          H1 dmm            c
at          3.620 dmf         200
np          32768 dseq
sw          4525.4 dres        1.0
fb          2600 homo         n
bs          4
tpwr        59 wtf file
pw          14.0 proc
d1          0.380 fn          65536
tof        481.6 math
nt          16
ct          16 werr
alock      n wexp process pH
gain      not used wbs
          FLAGS      wnt
il         n
in         n
dp         y
hs         nn
DISPLAY
sp         -309.5
wp         4525.4
vs         104
sc         0
wc         250
hzmm       18.10
ls         41.80
rfl        309.5
rfd        0
th         62
ins        5.400
nm cdc ph
```

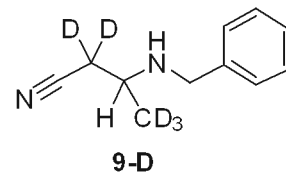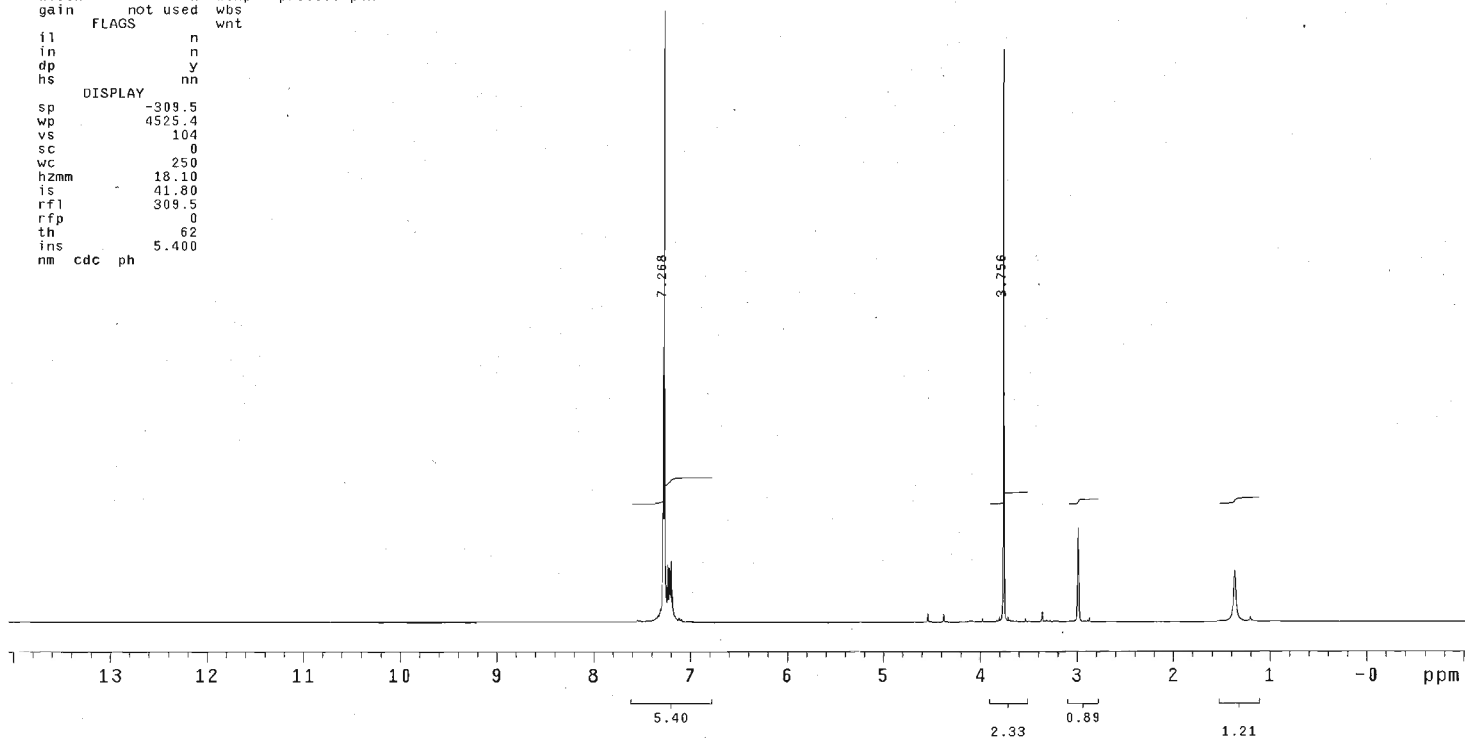

DHL-56D-3C

exp2 Carbon

| SAMPLE      |             | SPECIAL    |            |
|-------------|-------------|------------|------------|
| date        | Apr 25 2008 | temp       | 22.0       |
| solvent     | cdcl3       | gain       | not used   |
| file        | exp         | spin       | not used   |
| ACQUISITION |             |            |            |
| sw          | 26041.7     | pw90       | 7.500      |
| at          | 1.783       | alfa       | 10.000     |
| np          | 92842       | FLAGS      | 128.498 n  |
| fb          | 17000       |            | 128.464 n  |
| bs          | 16          |            | 127.951 n  |
| d1          | 1.220       | dp         | 127.951 y  |
| nt          | 1200        | hs         | 127.951 nn |
| ct          | 1200        | PROCESSING |            |
| tn          | TRANSMITTER | lb         | 0.50       |
| fn          | C13         | fb         | 282144     |
| DISPLAY     |             |            |            |
| sfrq        | 150.849     | sp         | 2268.5     |
| tof         | -2982.6     | wp         | 22015.8    |
| tpwr        | 58          | rfl        | 13333.2    |
| pw          | 7.500       | rffp       | 11814.5    |
| DECOUPLER   |             |            |            |
| dn          | H1          | rp         | -123.0     |
| dof         | 0           | lp         | 11.8       |
| PLOT        |             |            |            |
| dmm         | yyy         | wc         | 230        |
| dpwr        | 44          | sc         | 0          |
| dmf         | 13908       | vs         | 413        |
|             |             | th         | 5          |
|             |             | ai         | cdc ph     |

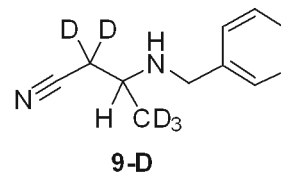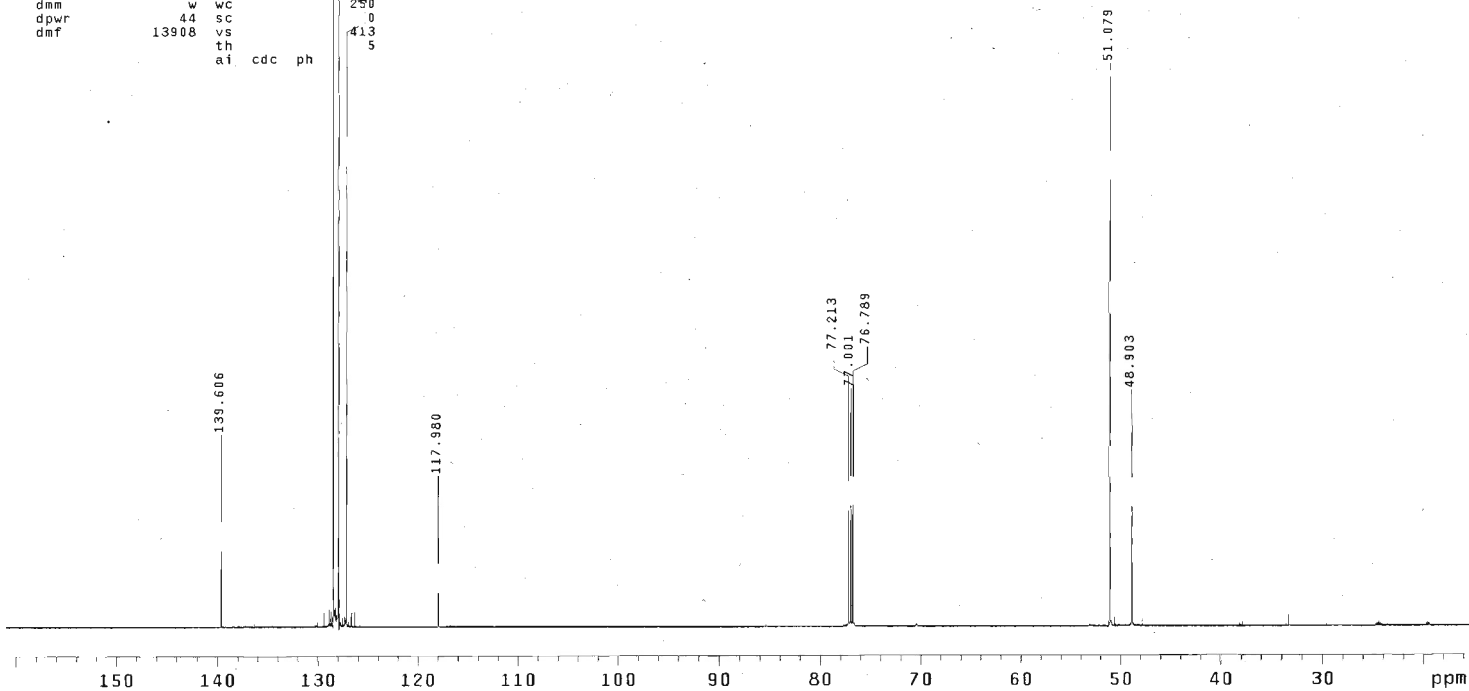

DHL-56D-3C

exp2 Carbon

```
SAMPLE SPECIAL 22.0
date Apr 25 2008 temp
solvent cdc13 gain not used
file exp spin not used
ACQUISITION hst 0.008
sw 26041.7 pw90 7.500
at 1.783 alfa 10.000
np 32842
fb 17000 il n
bs 16 in n
d1 1.220 dp y
nt 1200 hs nn
ct 1200
TRANSMITTER lb 0.50
tn C13 fn 262144
sfrq 150.849
tof -2982.6 sp DISPLAY 2124.7
tpwr 58 wp 2763.1
pw 7.500 rfl 13333.2
DECOUPLER rfp 11614.5
dn H1 rp -123.0
dof 0 lp PLOT 11.6
dm yyy w
dmm 44 wc 250
dpwr 44 sc 0
dmf 13908 vs 11217
th 12
ai cdc ph
```

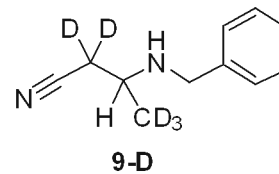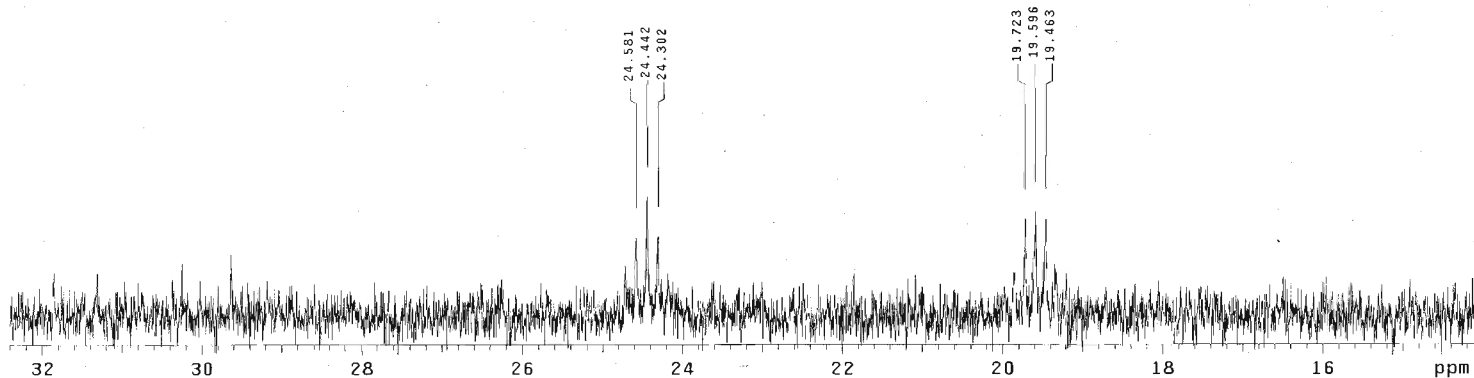

Supplement: NIHMS95811-supplement-3_si_003.pdf [file NIHMS95811-supplement-3_si_003.pdf]
